# Supplementary material
Source: MDPI journal article supplement (https://www.mdpi.com/2077-0472/12/2/308)
Supplement: s1 [file s1]

Archive with 4 entries (4 files):
- Figure legends.pdf
- Figure.S1.tif
- Figure.S2.tif
- Table.xlsx
