# Supplementary material
Source: MDPI journal article supplement (https://www.mdpi.com/2077-0472/12/2/308)
Supplement: s1 [file s1 › Table.xlsx]

## Sheet: Table S1
Table S1 List of genes and their primer pairs used for RT-qPCR validation
Gene ID	Forward Primer	Reverse Primer
TaActin	CGAAGCGACATACAATTCCATC	GAACCTCCACTGAGAACAACAT
TraesCS2A02G235500	GACCGTGTTGTTGAAGCC	CGTTGACGAAGGGAATGT
TraesCS4D02G170200	GCAGCACATGATGCTTTTGT	ATTGCCCATAACCTGAGCAC
TraesCS5B02G142100	ACCCACTCATCTACTCGCAG	AGGAACGGATGGATCAGCAT
TraesCS4B02G025500	ATCAAGGGAACCTCCTAACA	GTTCAACAAGCCGAAATCA
TraesCS5A02G054900	CTCAGCAAGAAGATCCTCATGG	CTTAGCTCTGTGTCATGATCGA
TraesCS2B02G305600	AAACGGGTGCTCGTGTCG	CGGGCTTCTCGTCTTGCT
TraesCS5A02G169000	CTGGAGAGGATTTGTTTGTGTG	GAAAGTGAAGCCTTGCATAGAG
TraesCS5D02G173300	AAGACTGATAGCCCGTGAG	TTGCAGGGTGTTTGGAT
TraesCS5A02G051400	GAAATATCGGGTTTCTTGTCGG	CCCAACATCTCACAAAGTTGTT
TraesCS3B02G181300	GGCGACGGCAAGGATAACG	TGAGCTGGTTGGCTGATAGCG
TraesCS3A02G022600	CTACTCCACCTTCTCCTC	GCACTCGGGCTCCATCCA
TraesCS5A02G189800	AAGGGCGACGAGCACTTC	CCGGGTTCCACCGGTATA
TraesCS5D02G229600	CGCCGTCTCCGTGTCCGT	GCCCCCTCCATTCCCTCC
TraesCS1D02G094800	GAAGGTGTACGGGTGGGC	GACTCGAAGAGGGTGAGG
TraesCS2D02G065300	CGGCATCCTCCTCTCCTC	CTGATCCTTCCGCCATTG

## Sheet: Table S2
Table S2 Genes in green module KEGG enriched pathways
KEGG_A_class	KEGG_B_class	Pathway	P-value	Pathway ID
Metabolism	Metabolism of terpenoids and polyketides	Diterpenoid biosynthesis	0.00729557	ko00904
Metabolism	Carbohydrate metabolism	Pentose and glucuronate interconversions	0.0237395	ko00040
Genetic Information Processing	Folding, sorting and degradation	Protein processing in endoplasmic reticulum	0.038478	ko04141
Metabolism	Carbohydrate metabolism	Inositol phosphate metabolism	0.161666	ko00562
Metabolism	Lipid metabolism	alpha-Linolenic acid metabolism	0.175274	ko00592
Metabolism	Lipid metabolism	Fatty acid elongation	0.193093	ko00062
Metabolism	Global and overview maps	Biosynthesis of secondary metabolites	0.195836	ko01110
Environmental Information Processing	Signal transduction	Plant hormone signal transduction	0.213183	ko04075
Organismal Systems	Environmental adaptation	Plant-pathogen interaction	0.224248	ko04626
Cellular Processes	Transport and catabolism	Peroxisome	0.243703	ko04146
Genetic Information Processing	Folding, sorting and degradation	RNA degradation	0.287394	ko03018
Metabolism	Biosynthesis of other secondary metabolites	Phenylpropanoid biosynthesis	0.287752	ko00940
Metabolism	Carbohydrate metabolism	Amino sugar and nucleotide sugar metabolism	0.359505	ko00520
Metabolism	Global and overview maps	Metabolic pathways	0.711183	ko01100

## Sheet: Table S3
Table S2 Fold change in lipid related genes expression (㏒2FC)
ID	20DAP_H242/H189	35DAP_H242/H189
TraesCS2A02G066700	-2.615	1.403
TraesCS2A02G219100	0	-4.831
TraesCS2B02G079200	-2.376	1.934
TraesCS2D02G065300	-2.435	2.249
TraesCS2D02G224200	0	-7.749
TraesCS1D02G169900	-3.785	0
TraesCS2B02G079500	-1.612	0
TraesCS2D02G065100	-3.583	0
TraesCS2A02G067000	-3.517	0
TraesCS2D02G065600	-2.091	0
TraesCS3B02G186100	-2.487	0
TraesCS1A02G013900	0	-4.007
TraesCS1A02G078800	0	-1.209
TraesCS1A02G102700	0	-2.064
TraesCS1B02G113700	1.775	-4.404
TraesCS1B02G113800	0	-1.041
TraesCS1D02G094800	0	4.435
TraesCS1D02G094900	0	2.15
TraesCS3B02G152200	2.009	-2.374
TraesCS3D02G299700	2.663	-2.098
TraesCS4B02G059300	5.298	-1.533
TraesCS1B02G097400	-2.612	0
TraesCS6D02G016700	1.172	0
TraesCS1D02G095400	2.57	0
TraesCS5D02G229600	0	1.191
TraesCS4A02G014600	-2.13	0
TraesCS2A02G255100	0	-1.269
TraesCS3A02G022600	2.433	1.172
TraesCS5A02G189800	4.381	0
