# Supplementary material
Source: MDPI journal article supplement (https://www.mdpi.com/2077-0472/12/2/308)

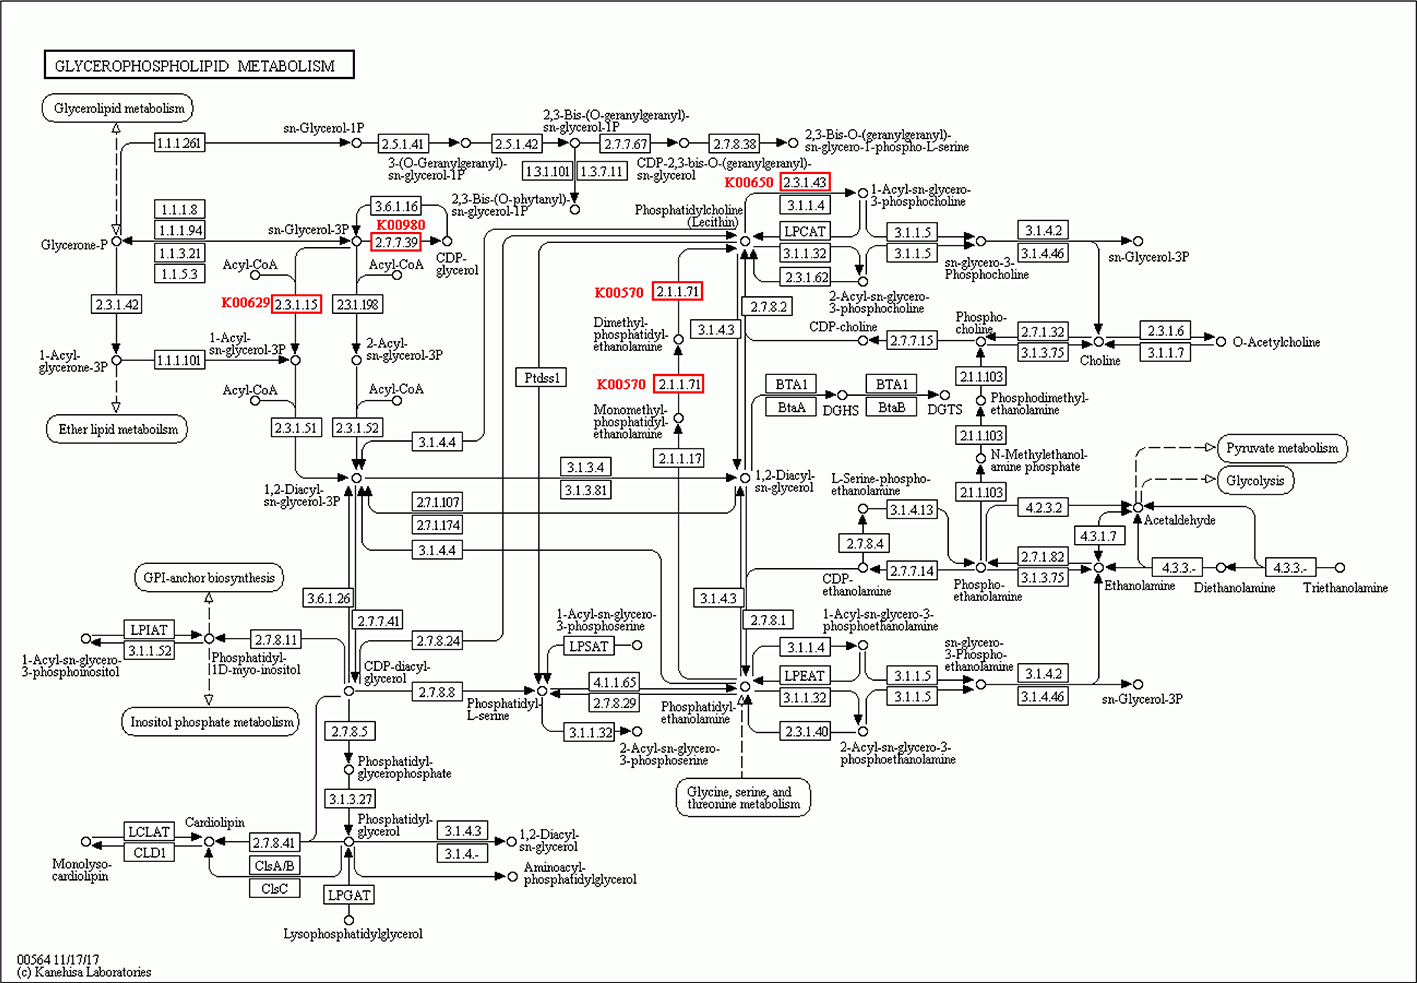

Supplement: s1 [file s1 › Figure.S1.tif]

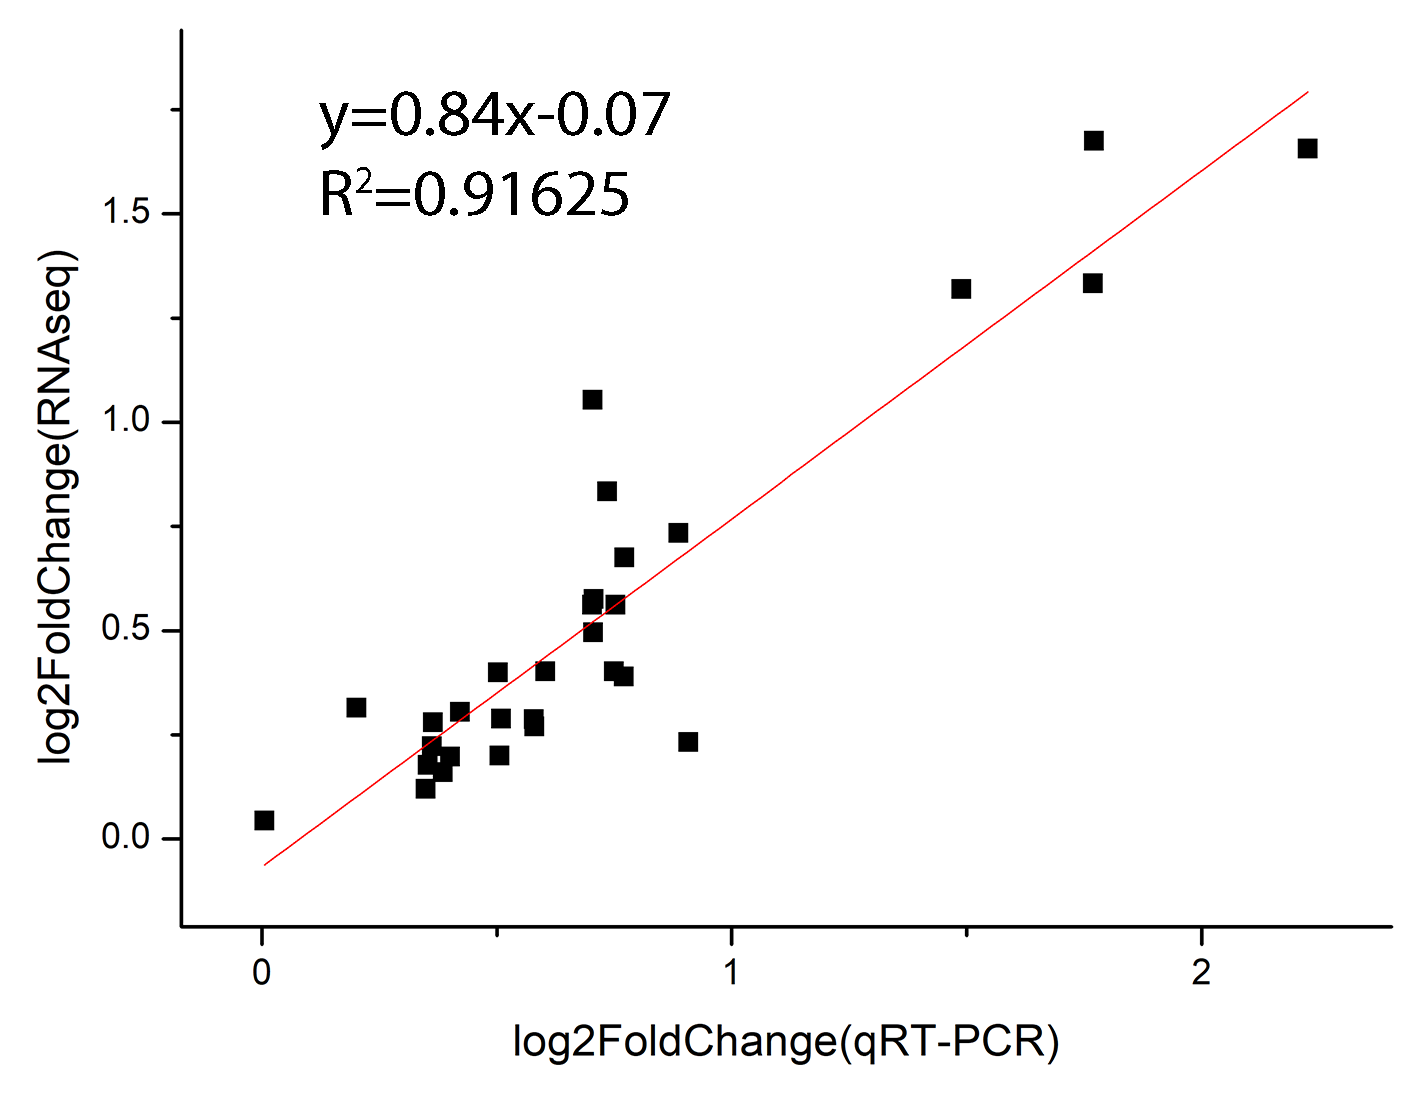

Supplement: s1 [file s1 › Figure.S2.tif]
